# Supplementary material
Source: publisher figshare collection journal article supplement (https://gsajournals.figshare.com/ndownloader/files/27628661)
Supplement: Supplementary file 1 [file 27628661]

## Sheet: Repeats
Chromosome or contig name	Indices	Period size	Copy number	Consensus size	Percent matches
QARZ01000002.1	9668422--9668919	90	5.5	90	73
QARZ01000002.1	9668486--9668941	90	5.1	90	72
QARZ01000002.1	9668964--9669890	90	10.3	91	69
QARZ01000005.1	307830--310158	90	25.9	89	69
QARZ01000012.1	24463557--24463723	90	1.8	90	79
QARZ01000018.1	21197192--21198569	90	15.3	89	69
QARZ01000018.1	21259244--21259417	90	1.9	90	90
QARZ01000483.1	144232--144698	90	5.2	91	77
QARZ01000497.1	136694--138841	90	23.6	92	71
QARZ01000497.1	144741--145342	90	6.7	90	72
QARZ01000497.1	144810--145355	90	6	92	73
QARZ01000497.1	155411--155648	90	2.8	86	80
QARZ01007142.1	4675--5285	90	6.8	89	68
QARZ01009394.1	11--697	90	7.7	89	72
QARZ01012699.1	4886--5050	90	1.8	90	81
QARZ01022737.1	2854--3083	90	2.5	90	81
QARZ01022737.1	2887--3117	90	2.6	90	84
QARZ01027244.1	820--1015	90	2.2	90	79
QARZ01032150.1	1--268	90	3	90	74
QARZ01032150.1	9--307	90	3.3	90	75
QARZ01033776.1	1930--2956	90	11.2	91	72
QARZ01034782.1	5722--5917	90	2.1	91	83
QARZ01039432.1	42343--42583	90	2.7	91	81
QARZ01039432.1	42374--42583	90	2.3	91	85
QARZ01040992.1	132630--132797	90	1.9	91	81
QARZ01040999.1	149192--149453	90	2.9	88	82
QARZ01041040.1	205875--206202	90	3.6	91	79
QARZ01000003.1	13590072--13590391	91	3.5	90	76
QARZ01000003.1	16812566--16812759	91	2.2	90	82
QARZ01000003.1	16812589--16812757	91	1.9	90	86
QARZ01000004.1	17117504--17119323	91	20.1	91	79
QARZ01000004.1	25997096--26000809	91	40.8	90	78
QARZ01000004.1	28073677--28074827	91	12.7	90	75
QARZ01000004.1	29645884--29647138	91	13.8	91	76
QARZ01000005.1	302172--302461	91	3.2	91	74
QARZ01000005.1	302595--302799	91	2.3	90	80
QARZ01000005.1	302624--302831	91	2.3	89	80
QARZ01000005.1	303417--303978	91	6.2	92	72
QARZ01000008.1	14515509--14517677	91	24.1	91	74
QARZ01000008.1	14521812--14524006	91	24.1	92	74
QARZ01000008.1	14524016--14524708	91	7.7	91	75
QARZ01000008.1	14524709--14525635	91	10.2	91	75
QARZ01000008.1	14530627--14532466	91	20.3	90	76
QARZ01000008.1	14532619--14533942	91	14.6	91	82
QARZ01000008.1	14537779--14538097	91	3.5	91	82
QARZ01000009.1	18799152--18800270	91	12.5	89	68
QARZ01000009.1	18801450--18801858	91	4.5	91	75
QARZ01000011.1	16312575--16312765	91	2.1	91	80
QARZ01000011.1	16314182--16316354	91	23.7	91	72
QARZ01000011.1	16321148--16322800	91	18.2	91	77
QARZ01000011.1	16322821--16324794	91	21.7	91	74
QARZ01000011.1	16324793--16327326	91	28	91	73
QARZ01000011.1	16327334--16330960	91	40	91	76
QARZ01000012.1	24463487--24463813	91	3.6	89	72
QARZ01000012.1	24463655--24463882	91	2.5	91	77
QARZ01000018.1	21140840--21142312	91	16.3	91	79
QARZ01000018.1	21142315--21143897	91	17.5	91	78
QARZ01000018.1	21143996--21153308	91	102.4	91	75
QARZ01000018.1	21154785--21155676	91	9.8	90	80
QARZ01000018.1	21162378--21162667	91	3.3	88	74
QARZ01000018.1	21164477--21165710	91	13.6	91	75
QARZ01000018.1	21165728--21167031	91	14.4	91	79
QARZ01000018.1	21175895--21176462	91	6.3	91	76
QARZ01000018.1	21192035--21192841	91	8.9	91	76
QARZ01000018.1	21192848--21196018	91	35	91	77
QARZ01000018.1	21196071--21196285	91	2.4	91	79
QARZ01000018.1	21196355--21198573	91	24.6	90	70
QARZ01000018.1	21203619--21209858	91	68.6	91	78
QARZ01000018.1	21219387--21221270	91	20.7	90	76
QARZ01000018.1	21223888--21224184	91	3.3	90	80
QARZ01000018.1	21223888--21224241	91	3.9	91	79
QARZ01000018.1	21225392--21226701	91	14.5	90	73
QARZ01000018.1	21226743--21227222	91	5.3	91	75
QARZ01000018.1	21227225--21228701	91	16.3	91	76
QARZ01000018.1	21234681--21236307	91	18	91	76
QARZ01000018.1	21236315--21238157	91	20.4	91	79
QARZ01000018.1	21258783--21259077	91	3.2	90	72
QARZ01000018.1	21264096--21265621	91	16.8	91	68
QARZ01000018.1	21305103--21306985	91	20.9	92	72
QARZ01000018.1	21307100--21307267	91	1.9	90	81
QARZ01000018.1	21307330--21309066	91	19.1	89	70
QARZ01000483.1	141827--144215	91	26.3	90	76
QARZ01000497.1	135240--135889	91	7.2	91	76
QARZ01000497.1	136189--139418	91	35.7	89	71
QARZ01000497.1	139812--141942	91	23.6	91	73
QARZ01000497.1	141942--144719	91	30.6	91	73
QARZ01000497.1	144818--144983	91	1.9	88	82
QARZ01000497.1	146974--147965	91	11	90	77
QARZ01000497.1	148121--148403	91	3.1	91	66
QARZ01000497.1	148336--149455	91	12.2	90	67
QARZ01000497.1	155496--156393	91	9.9	91	72
QARZ01000671.1	228--1259	91	11.4	91	74
QARZ01002219.1	1330--3222	91	20.8	91	74
QARZ01002304.1	184--1187	91	11	91	77
QARZ01002304.1	2--480	91	5.3	91	74
QARZ01004959.1	1--1054	91	11.6	90	85
QARZ01005764.1	3--3426	91	37.7	91	84
QARZ01006600.1	1202--2144	91	10.4	90	78
QARZ01006600.1	2162--3977	91	19.9	91	76
QARZ01006600.1	4045--5341	91	14.2	90	74
QARZ01006600.1	5351--7971	91	28.9	91	74
QARZ01006600.1	8029--8225	91	2.2	91	83
QARZ01006600.1	8061--8276	91	2.4	91	79
QARZ01006708.1	2--616	91	6.8	89	73
QARZ01006708.1	759--1158	91	4.4	91	82
QARZ01006762.1	17--1266	91	13.8	90	70
QARZ01007274.1	4--1533	91	16.9	90	69
QARZ01007812.1	157--539	91	4.2	90	81
QARZ01009114.1	1--1897	91	20.8	91	85
QARZ01010342.1	4--1686	91	18.6	91	79
QARZ01010551.1	11--1305	91	14.3	90	75
QARZ01011145.1	1--2421	91	26.6	91	85
QARZ01011776.1	329--798	91	5.2	91	78
QARZ01011776.1	3696--4969	91	14	91	74
QARZ01011776.1	6150--6754	91	6.6	91	72
QARZ01012148.1	232--444	91	2.3	91	87
QARZ01012148.1	452--1339	91	9.8	91	73
QARZ01012879.1	2250--3086	91	9.3	91	73
QARZ01014204.1	1--2297	91	25.2	91	72
QARZ01014204.1	2305--3178	91	9.6	91	75
QARZ01014680.1	1076--1801	91	8	90	74
QARZ01017000.1	1021--2214	91	13.1	92	78
QARZ01017550.1	1--2076	91	22.8	91	85
QARZ01017922.1	210--1285	91	11.8	90	75
QARZ01017942.1	5--1150	91	12.7	90	77
QARZ01018099.1	105--424	91	3.5	91	82
QARZ01019380.1	1--484	91	5.3	91	75
QARZ01019380.1	493--1108	91	6.8	90	73
QARZ01019806.1	1--1243	91	13.7	91	82
QARZ01020306.1	2--2352	91	25.9	91	77
QARZ01020433.1	2031--3646	91	17.8	91	75
QARZ01021967.1	1--2880	91	31.6	90	78
QARZ01023397.1	1331--1552	91	2.4	91	77
QARZ01023397.1	1479--1651	91	1.9	91	83
QARZ01023397.1	1492--1706	91	2.4	91	79
QARZ01023397.1	1728--3040	91	14.4	91	70
QARZ01023673.1	1066--1370	91	3.4	91	86
QARZ01023673.1	5--965	91	10.6	91	84
QARZ01023892.1	1--442	91	4.9	91	85
QARZ01023892.1	1609--1975	91	4	91	85
QARZ01023892.1	543--968	91	4.7	91	82
QARZ01023892.1	973--1549	91	6.3	91	84
QARZ01023999.1	10--572	91	6.2	91	84
QARZ01023999.1	673--1253	91	6.4	91	87
QARZ01024931.1	379--5149	91	52.4	91	71
QARZ01024931.1	5289--6002	91	7.8	89	72
QARZ01024931.1	98--312	91	2.4	90	85
QARZ01025451.1	1472--2731	91	13.9	91	77
QARZ01025834.1	1--765	91	8.4	91	78
QARZ01025834.1	773--1414	91	7.1	91	77
QARZ01026292.1	15--1413	91	15.6	89	71
QARZ01026587.1	811--2357	91	17.1	91	79
QARZ01027244.1	1110--1401	91	3.2	90	71
QARZ01027244.1	1148--1435	91	3.2	90	72
QARZ01027652.1	2675--4745	91	22.9	91	72
QARZ01027652.1	4953--6626	91	18.4	90	76
QARZ01027941.1	1102--1946	91	9.3	91	78
QARZ01027941.1	1948--2938	91	10.9	90	75
QARZ01027941.1	3--1058	91	11.6	90	75
QARZ01028006.1	768--2925	91	23.7	91	76
QARZ01029489.1	397--4066	91	40.5	91	81
QARZ01029489.1	4073--6061	91	22	91	80
QARZ01029489.1	6077--6754	91	7.5	91	76
QARZ01030009.1	15215--15846	91	6.9	91	83
QARZ01030009.1	15982--16650	91	7.4	89	78
QARZ01030114.1	47--303	91	2.8	90	83
QARZ01030360.1	10--834	91	9.1	91	75
QARZ01030360.1	932--2253	91	14.5	91	81
QARZ01030405.1	1730--2463	91	8.1	90	78
QARZ01030405.1	4--1694	91	18.7	89	75
QARZ01030582.1	1441--2070	91	6.9	90	81
QARZ01030912.1	230--535	91	3.4	91	93
QARZ01030912.1	761--977	91	2.4	91	82
QARZ01031171.1	2889--4603	91	18.9	91	72
QARZ01031171.1	6629--7917	91	14.2	90	73
QARZ01031171.1	7950--10111	91	23.8	91	73
QARZ01031662.1	4--486	91	5.4	91	78
QARZ01031662.1	489--1180	91	7.6	90	78
QARZ01032150.1	1079--2916	91	20.3	91	73
QARZ01032150.1	2916--4293	91	15.1	91	72
QARZ01032150.1	5566--5852	91	3.2	90	72
QARZ01032150.1	6137--6311	91	1.9	92	79
QARZ01032761.1	90--1085	91	10.9	92	71
QARZ01033543.1	1--1504	91	16.6	91	77
QARZ01033543.1	1501--1904	91	4.4	91	84
QARZ01033543.1	1934--2242	91	3.4	91	78
QARZ01033776.1	1926--2956	91	11.2	91	75
QARZ01034098.1	1936--4921	91	32.6	90	76
QARZ01034098.1	4291--5279	91	10.9	89	74
QARZ01034098.1	5319--6142	91	9.1	91	78
QARZ01034098.1	817--1912	91	12.1	91	85
QARZ01034364.1	1565--3507	91	21.4	91	73
QARZ01034364.1	413--715	91	3.3	91	76
QARZ01034364.1	72--286	91	2.4	91	84
QARZ01034364.1	770--1490	91	7.9	89	72
QARZ01034782.1	2887--5703	91	31.1	90	75
QARZ01034782.1	5972--6409	91	4.8	91	75
QARZ01035216.1	4041--5027	91	10.9	90	73
QARZ01035708.1	1--1329	91	14.6	91	82
QARZ01035718.1	1--1413	91	15.6	91	75
QARZ01036496.1	1--2233	91	24.4	91	87
QARZ01036780.1	1042--1365	91	3.5	91	75
QARZ01037246.1	2172--2464	91	3.2	90	79
QARZ01037246.1	2690--2949	91	2.9	91	80
QARZ01037246.1	3083--4329	91	13.7	91	72
QARZ01037246.1	4393--5131	91	8.1	90	73
QARZ01037246.1	4760--5238	91	5.3	90	70
QARZ01037246.1	5241--5407	91	1.8	91	82
QARZ01037246.1	5550--5885	91	3.7	90	74
QARZ01037806.1	1009--1712	91	7.7	91	77
QARZ01038183.1	12616--13308	91	7.6	91	79
QARZ01038183.1	5203--7251	91	22.5	91	80
QARZ01038183.1	7341--8862	91	16.6	91	77
QARZ01038456.1	1--1791	91	19.7	91	85
QARZ01038857.1	10697--12594	91	20.9	91	77
QARZ01038857.1	14372--16850	91	27.4	92	73
QARZ01038857.1	30088--32654	91	28.2	92	74
QARZ01038857.1	34205--36380	91	23.9	91	77
QARZ01038857.1	36381--38854	91	27.1	91	79
QARZ01038857.1	37531--39550	91	22.4	91	85
QARZ01039432.1	35918--36805	91	9.8	91	74
QARZ01039432.1	36813--39478	91	29.4	91	70
QARZ01039432.1	39257--39509	91	2.8	91	82
QARZ01039432.1	39716--39973	91	3	87	80
QARZ01039432.1	39801--41979	91	24	91	70
QARZ01039432.1	42374--42583	91	2.3	91	85
QARZ01039432.1	42752--44059	91	14.4	91	70
QARZ01039817.1	15594--17070	91	16.1	91	74
QARZ01039817.1	25727--27294	91	17.1	91	75
QARZ01039817.1	30035--31035	91	11	91	80
QARZ01039817.1	31072--32748	91	18.5	91	78
QARZ01039817.1	32821--34464	91	18.1	91	79
QARZ01039817.1	34501--36177	91	18.5	91	78
QARZ01039817.1	36216--38119	91	20.9	91	77
QARZ01039817.1	37899--38149	91	2.8	91	85
QARZ01039817.1	39203--41198	91	21.8	91	77
QARZ01039817.1	4615--5543	91	10.3	91	72
QARZ01039817.1	5543--7008	91	16	91	73
QARZ01039817.1	7032--7804	91	8.5	90	76
QARZ01040249.1	100--1020	91	10.1	91	71
QARZ01040417.1	66500--66665	91	1.8	91	88
QARZ01040417.1	67190--67670	91	5.3	91	75
QARZ01040719.1	15030--16176	91	12.6	92	79
QARZ01040719.1	16322--17131	91	8.9	91	75
QARZ01040719.1	17254--17499	91	2.7	90	80
QARZ01040719.1	17254--17527	91	3	89	79
QARZ01040719.1	18798--20828	91	22.4	91	72
QARZ01040719.1	56161--56460	91	3.3	90	80
QARZ01040719.1	56468--56946	91	5.3	90	72
QARZ01040719.1	57123--57391	91	3	91	87
QARZ01040756.1	106858--108857	91	22.1	90	70
QARZ01040992.1	106507--108105	91	17.6	91	77
QARZ01040992.1	111744--112666	91	10.1	92	77
QARZ01040992.1	112670--113125	91	5	90	76
QARZ01040992.1	118131--118712	91	6.4	91	80
QARZ01040992.1	119990--123161	91	34.9	91	76
QARZ01040992.1	129572--133122	91	39	91	76
QARZ01040992.1	133128--133636	91	5.6	90	76
QARZ01040992.1	133651--133864	91	2.3	91	76
QARZ01040992.1	133887--137655	91	41.3	89	73
QARZ01040992.1	137748--138104	91	4	90	78
QARZ01040992.1	150870--151535	91	7.3	90	75
QARZ01040992.1	151540--152049	91	5.6	90	76
QARZ01040992.1	152102--152754	91	7.2	91	77
QARZ01040992.1	152862--153079	91	2.4	92	76
QARZ01040992.1	183771--184117	91	3.8	91	83
QARZ01040992.1	184115--184921	91	8.9	91	79
QARZ01040992.1	186630--189717	91	33.8	91	77
QARZ01040992.1	191424--192264	91	9.2	91	78
QARZ01040992.1	192266--193935	91	18.3	90	75
QARZ01040992.1	194076--194885	91	8.9	91	74
QARZ01040992.1	194913--195667	91	8.3	91	74
QARZ01040992.1	195685--196585	91	9.8	91	75
QARZ01040992.1	196686--197398	91	7.8	90	79
QARZ01040992.1	215190--218552	91	36.9	91	69
QARZ01040992.1	218571--219159	91	6.5	91	75
QARZ01040992.1	95238--96632	91	15.2	90	80
QARZ01040999.1	145193--145589	91	4.4	89	80
QARZ01040999.1	145194--145513	91	3.5	90	84
QARZ01040999.1	145991--148205	91	24.6	91	75
QARZ01040999.1	148206--148995	91	8.7	91	71
QARZ01040999.1	149003--149488	91	5.4	90	78
QARZ01041040.1	173187--176946	91	41.4	90	69
QARZ01041040.1	178816--179608	91	8.7	91	69
QARZ01041040.1	179539--179712	91	1.9	91	81
QARZ01041040.1	179802--180039	91	2.6	91	81
QARZ01041040.1	180762--181394	91	7	89	68
QARZ01041040.1	205574--206367	91	8.8	90	72
QARZ01041080.1	1533--2167	91	7	90	70
QARZ01041080.1	1624--2100	91	5.2	90	72
QARZ01041080.1	275--1535	91	13.8	92	69
QARZ01041114.1	325586--326832	91	13.7	90	71
QARZ01041114.1	326961--327859	91	9.9	91	75
QARZ01041118.1	479332--479527	91	2.2	91	86
QARZ01000004.1	26690396--26690582	92	2	94	94
QARZ01000497.1	147985--148189	92	2.3	88	78
QARZ01038857.1	30088--30480	92	4.3	92	91
